# Supplementary material
Source: PubMed Central journal article supplement (PMC6185898)
Supplement: NIHMS978825-supplement-Supplementary_Figure_1.pdf [file NIHMS978825-supplement-Supplementary_Figure_1.pdf]

# Supplementary Information

## Preparation and Noninvasive Imaging of Biogenic Gas Vesicle Nanostructures

**Authors:** Anupama Lakshmanan<sup>#</sup>, George J. Lu<sup>#</sup>, Arash Farhadi<sup>#</sup>, Suchita P. Nety<sup>#</sup>, Martin Kunth, Audrey Lee-Gosselin, David Maresca, Raymond W. Bourdeau, Melissa Yin, Judy Yan, Christopher Witte, Dina Malounda, F. Stuart Foster, Leif Schröder and Mikhail G. Shapiro\*  
<sup>#</sup>Equal contribution, \*Corresponding author ([mikhail@caltech.edu](mailto:mikhail@caltech.edu))

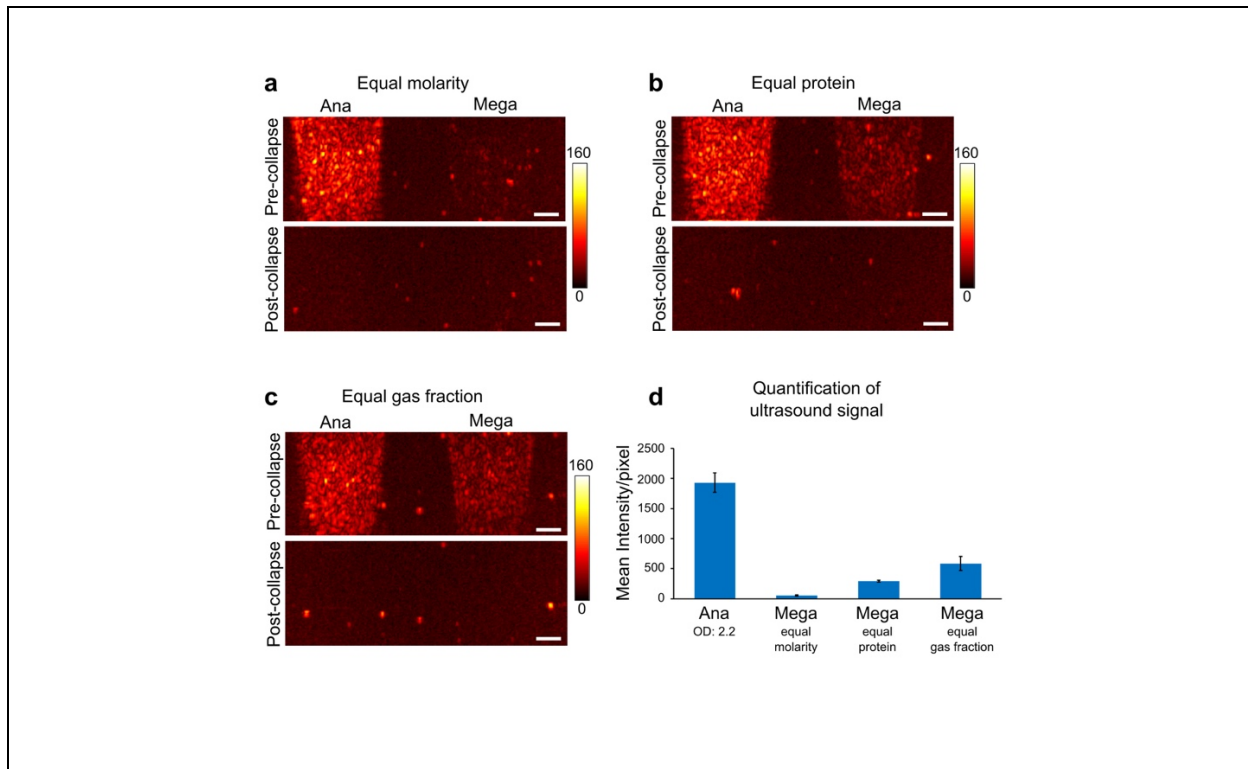

**Supplementary Figure 1**

### Ultrasound imaging of Mega GV's

B-mode ultrasound images of purified, wild-type Ana GV's (OD<sub>500,ps</sub> : 2.2) versus a purified and unclustered batch of Mega GV's at (a) equal molarity, (b) equal protein concentration and (c) equal gas fraction. Scale bars are 1 mm. Images were acquired using the Verasonics L22-14v transducer and the ray-lines script with the following parameters: transmit frequency: 18MHz, number of cycles of the transmitted pulse: 6, F number: 2, imaging voltage: 3V, with the transducer focus (8 mm depth) aligned close to the center of the sample well. Images were processed and analyzed using MATLAB. Images are shown before (top panel) and after collapse (bottom panel) using a high-power burst from the transducer at 25V for 10 s. (d) Quantification of ultrasound signal was performed by selecting a region of interest (ROI) of defined size within the sample well and calculating the mean intensity per pixel for the selected ROI, after post-collapse background subtraction (n=12 for Ana GV's, n=4 for Mega GV's at each condition shown in a, b and c; error bars are SEM).
